# Supplementary material for: Ultrathin-nanosheet-based 3D hierarchical porous In2S3 microspheres: chemical transformation synthesis, characterization, and enhanced photocatalytic and photoelectrochemical property
Source: Royal Society of Chemistry journal article supplement (doi:10.1039/c4ta05729e), 2014-12-12
Supplement: c4ta05729e1.pdf [file c4ta05729e1.pdf]

## Supplementary Information

### Ultrathin-Nanosheet-based 3D Hierarchical Porous In<sub>2</sub>S<sub>3</sub>

#### Microspheres: Chemical Transformation Synthesis, Characterization, and Enhanced Photocatalytic and Photoelectrochemical Property

Rui Wu<sup>a,b</sup>, You Xu<sup>b</sup>, Rui Xu<sup>b</sup>, Yi Huang<sup>a,b</sup> and Bin Zhang<sup>\*b</sup>

<sup>a</sup> School of Chemical Engineering and Technology, Tianjin University, Tianjin, 300072, P. R. China.

<sup>b</sup> Department of Chemistry, School of Science, Tianjin University, and Collaborative Innovation Center of Chemical Science and Engineering (Tianjin), Tianjin, 300072, P. R. China. Fax&Tel: +86 022 2740347; E-mail: bzhang@tju.edu.cn

#### 1. Materials

All reagents were used without further purification.

#### 2. Experimental Section

##### 2.1 Synthesis of InS-TETA

In a typical synthesis, tartaric acid (2 mmol, 0.3 g), InCl<sub>3</sub> (1 mmol, 0.2212 g) and L-cysteine (6 mmol, 0.7269 g) were added into a mixture solvent of deionized water (DIW) and TETA with a total volume of 18 mL ( $V_{\text{DIW}}/V_{\text{TETA}}=2:1$ ) in a 50 mL Teflon-lined stainless-steel autoclave. After stirring to form a homogeneous solution, the system was treated at 160°C for 24 h and cooled down naturally. The white floccule formed after reaction was washed by DIW and absolute ethanol, respectively, and dried in a vacuum oven.

##### 2.2 Synthesis of 3HPM In<sub>2</sub>S<sub>3</sub>

10 mg as-prepared InS-TETA was put into a solvent of 12 mL DIW in a 20 mL Teflon-lined stainless-steel autoclave under stirring to form a homogeneous solution. After kept at 180°C for 10 h, the yellow floccule formed after reaction was washed by DIW and absolute ethanol, respectively, and dried in a vacuum oven.

##### 2.3 Synthesis of 3SM In<sub>2</sub>S<sub>3</sub>

3SM In<sub>2</sub>S<sub>3</sub> was prepared using a modified procedure according to the synthesis of InS-TETA. In short, tartaric acid (2 mmol, 0.3 g), InCl<sub>3</sub> (1 mmol, 0.2212 g) and L-

cysteine (6 mmol, 0.7269 g) were added into a single solvent of 18 mL DIW. The followed procedure was as mentioned before.

## **2.4 Characterizations**

The scanning electron microscopy (SEM) images and Energy-dispersive X-ray spectroscopic (EDX) analysis were taken with a Hitachi S-4800 scanning electron microscope (SEM, 5 kV) equipped with the Thermo Scientific energy-dispersion X-ray fluorescence analyzer. Transmission electron microscopy (TEM) and higher-magnification transmission electron microscopy (HRTEM) were obtained with FEI Tecnai G<sup>2</sup>F20 system equipped with GIF 863 Tridiem (Gatan). Specimens for TEM and HRTEM measurements were prepared via dropcasting a droplet of ethanol suspension onto a copper grid, coated with a thin layer of amorphous porous carbon film, and allowed to dry in air. The X-ray diffraction patterns (XRD) of the products were recorded with Bruker D8 Focus Diffraction System using a Cu K $\alpha$  source ( $\lambda$ =0.154178 nm). The pore size distributions of the synthesized materials were determined by nitrogen physisorption using Quadrasorb SII Quantachrome Instrument. Pore size distributions were calculated using the Barrett-Joyner-Halenda method from the desorption branch. FTIR spectra were recorded on a MAGNA-IR 750 (Nicolet Instrument Co) FTIR spectrometer. UV-vis diffuse reflectance spectra (UV-vis DRS) were recorded on a Lambda 750 UV-vis-NIR spectrometer (Perkin-Elmer) equipped with an integrating sphere. The UV-vis DRS of solid samples were collected in 200-800 nm against BaSO<sub>4</sub> reflectance standard.

## **2.5 Photocatalytic Measurement**

For both 3HPM In<sub>2</sub>S<sub>3</sub> and comparison group, 15 mg sample was first immersed in the MO solution (15 mg/L) with a total volume of 100 mL and kept for a whole night to get absorption equilibrium. The system was irradiated directly under a 300W Xe lamp (Perfectlight) for 90 min at ambient atmosphere under UV-visible irradiation. After each 30 min intervals, 5 mL of MO solution was removed from the system for analysis. The degradation of MO was investigated by measuring its absorption spectra using UV-vis spectrophotometer.

## **2.5 Photoelectrochemical (PEC) Measurement**

PEC measurements were carried out in a standard three-compartment cell consisting of a working electrode, a Pt gauze counter electrode, and a saturated calomel reference electrode (SCE) performed using an electrochemical workstation (CHI 660D, CH Instruments, Austin, TX) under UV-visible irradiation (the same with

that in photocatalytic measurement) in the presence of  $\text{H}_2\text{SO}_4$  (0.5 M) as electrolyte and scarifying agent. An indium-tin oxide glass (ITO) decorated with catalyst samples were used as the working electrode. For a typical procedure for fabricating the working electrode, 4 mg of 3HPM  $\text{In}_2\text{S}_3$  catalysts were dispersed in 4.384 mL of water containing Nafion solution (40  $\mu\text{L}$ , 5 wt%), then the mixture was ultrasonicated to generate a homogeneous ink. Then 160  $\mu\text{L}$  of the catalyst ink (containing 0.145 mg of catalyst) was spreaded on an ITO glass (loading amount:  $\sim 0.12 \text{ mg/cm}^2$ ).

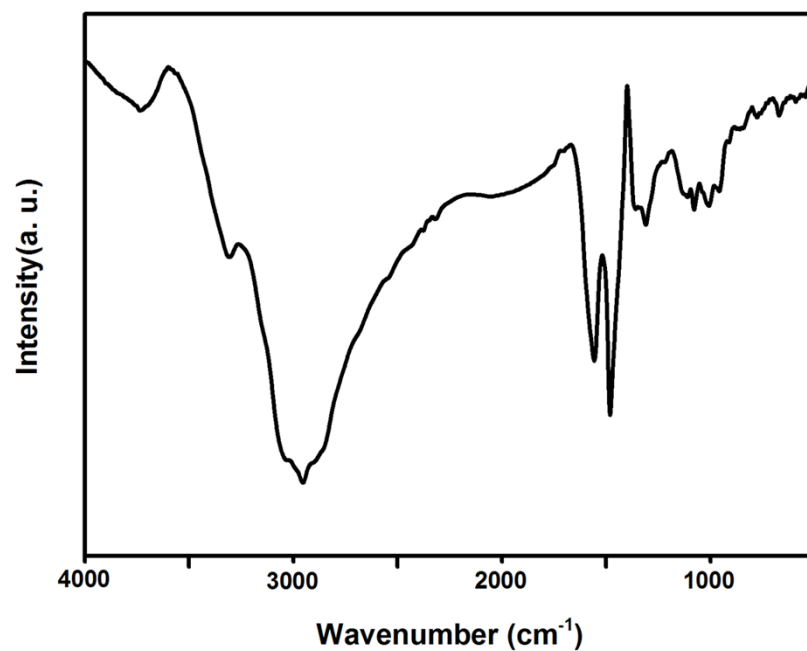

**Figure S1.** FTIR spectra of InS-TETA hybrid precursor, suggesting the existence of TETA in this hybrid.

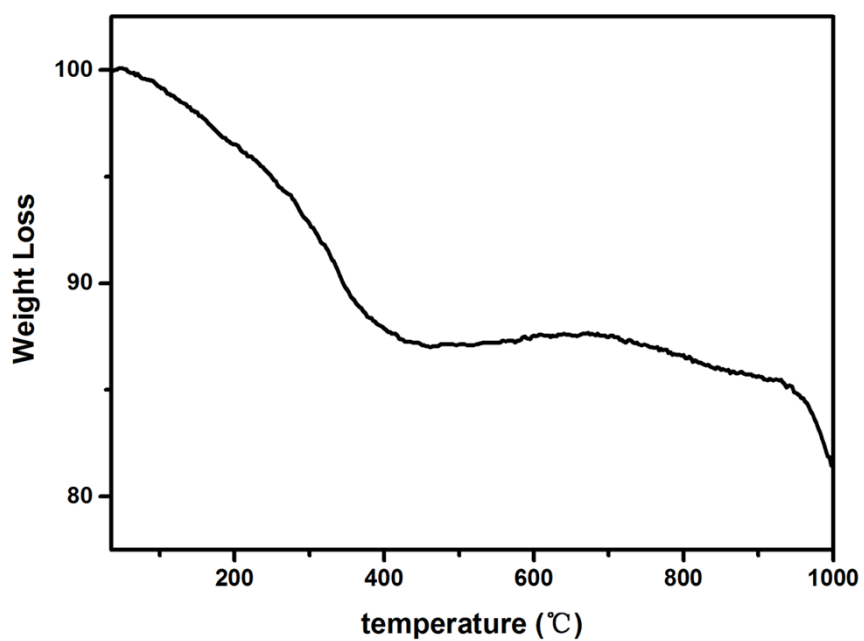

**Figure S2.** Thermogravimetric analysis curve of In<sub>2</sub>S<sub>3</sub> prepared at 120°C, showing that as-prepared products still contain organic components.

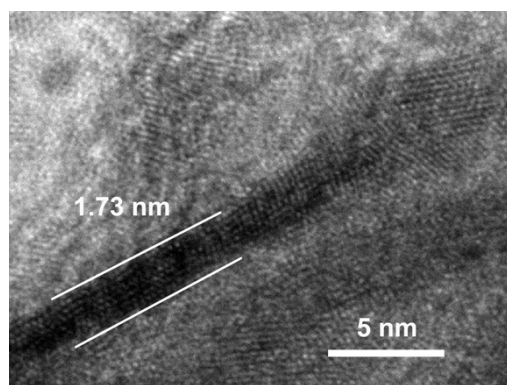

**Figure S3.** Magnified TEM image of a vertical nanosheet in 3HPM  $\text{In}_2\text{S}_3$ , suggesting the thickness of a typical nanosheets to be 1.73 nm.

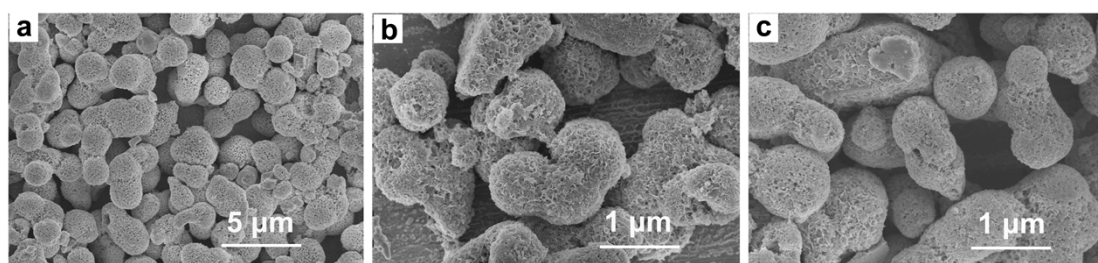

**Figure S4.** SEM images of  $\text{In}_2\text{S}_3$  prepared at different temperatures: (a) 120 °C, (b) 150 °C and (c) 200 °C. It demonstrates that under different temperatures, nanosheet-like building block will not change, but the macro-morphology cannot be maintained.

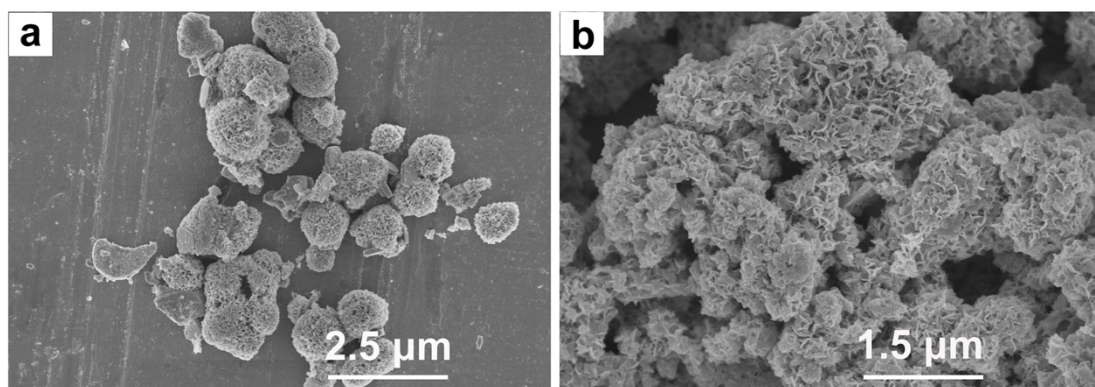

**Figure S5.** SEM images of  $\text{In}_2\text{S}_3$  prepared using different amount of InS-TETA hybrid precursors: (a) 2 mg; (b) 30 mg, revealing that different concentrations of

starting materials will result in irregular macro-morphology with nanosheet-like building blocks unchanged.

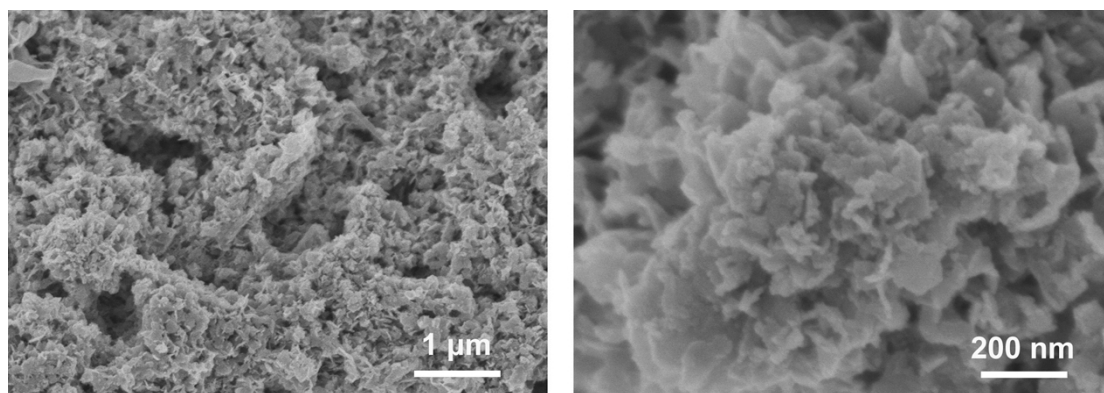

**Figure S6.** SEM images of In<sub>2</sub>S<sub>3</sub> prepared using TETA and DIW as solvent ( $V_{\text{TETA}}/V_{\text{DIW}} = 1/3$  with total volume of 12 mL), confirming the importance of using single DIW as solvent for the maintaining of macro-sized morphology.

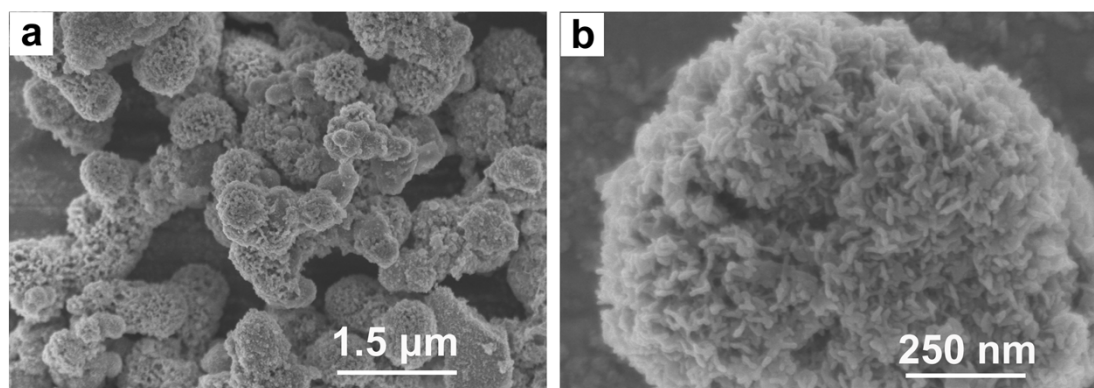

**Figure S7.** SEM images of In<sub>2</sub>S<sub>3</sub> prepared using EG as solvent: (a) a general overview; (b) one typical microsphere, demonstrating that with EG as solvent, the building blocks change into nanorods.

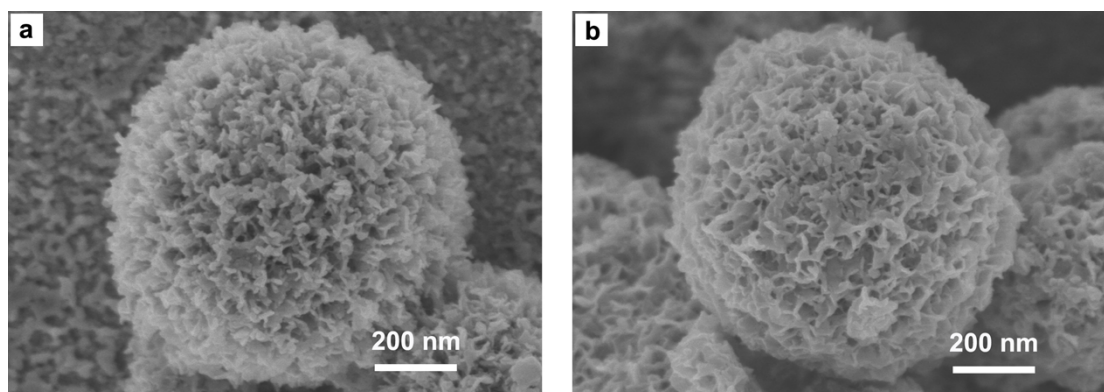

**Figure S8.** SEM images of time-dependent intermediates: (a) at 1 h; (b) at 3 h.

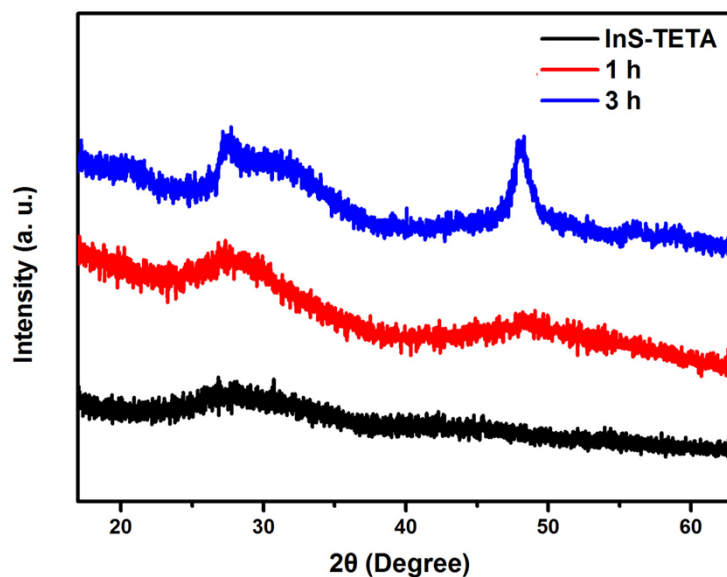

**Figure S9.** XRD patterns of inorganic-organic InS-TETA hybrid precursors and time-dependent intermediates at 1 h and 3 h. It's demonstrated that InS-TETA precursors are not well-crystalline, and with further reaction, peaks for inorganic  $\text{In}_2\text{S}_3$  (PDF no. 00-32-0456) are becoming more and more obvious, suggesting the gradual formation of inorganic  $\text{In}_2\text{S}_3$ . Thus, the successful transformation from inorganic-organic InS-TETA precursors into inorganic  $\text{In}_2\text{S}_3$  has been confirmed.

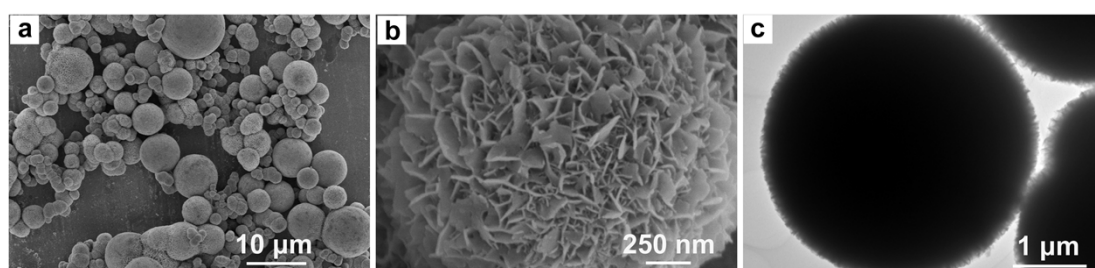

**Figure S10.** SEM images (a, b) and TEM image (c) of 3SM  $\text{In}_2\text{S}_3$ , revealing the 3D solid structure for comparison group.



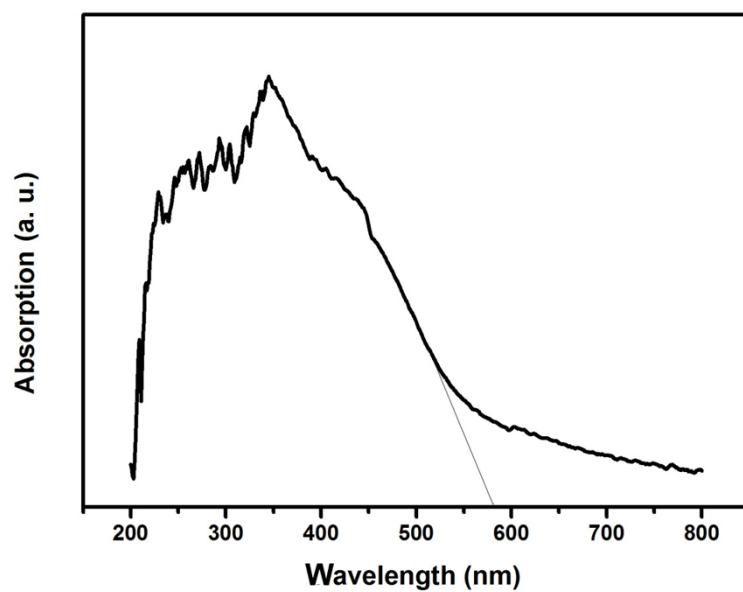

**Figure S11.** UV/Vis diffuse reflectance spectra of  $\text{In}_2\text{S}_3$  microspheres, showing the band gap of 3HPM  $\text{In}_2\text{S}_3$  to be about 2.14 eV as well as a strong absorption in ranging from visible to UV region.

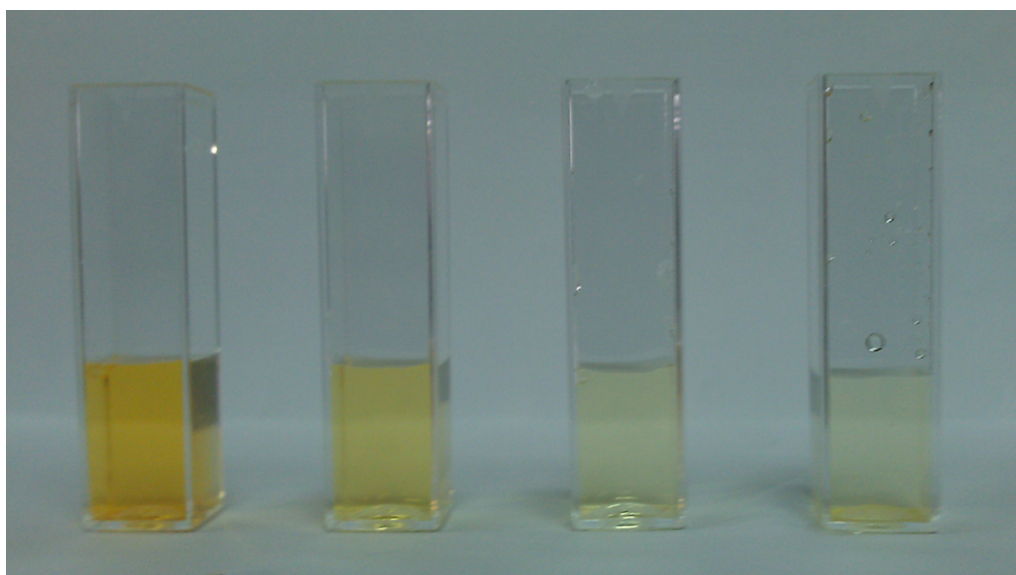

**Figure S12.** Color change of degradation of MO using 3HPM  $\text{In}_2\text{S}_3$  as catalyst. The color change during photodegradation of MO is evident.
